# Supplementary material for: Data-mining analysis of the global distribution of soil carbon in observational databases and Earth system models
Source: Copernicus journal article supplement (doi:10.5194/gmd-10-1321-2017), 2017-03-28
Supplement: Supplementary file 1 [file supplement.pdf › Supplement/supplement.pdf]

*Supplement to*

**Data-mining analysis of the global distribution of soil carbon in  
observational databases and Earth system models**

S. Hashimoto et al.

Correspondence: S. Hashimoto ([shojih@ffpri.affrc.go.jp](mailto:shojih@ffpri.affrc.go.jp))

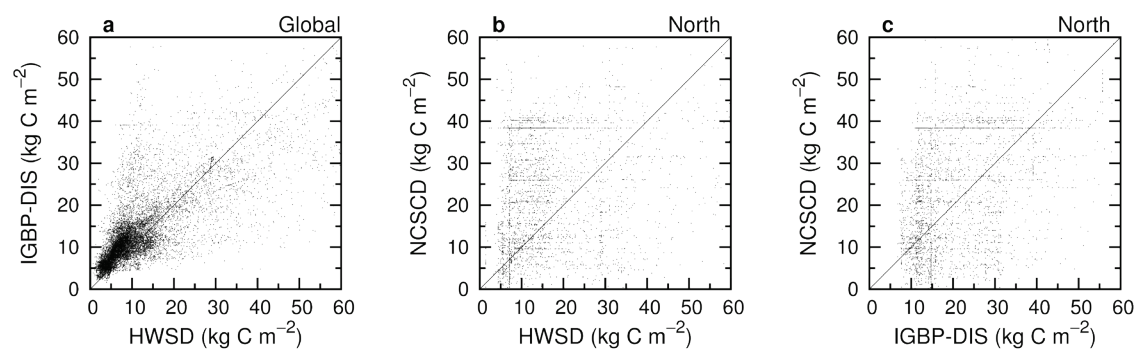

Figure S1: Grid-scale comparison ( $1^\circ$ ) of SOC databases (a: global; b and c: north).

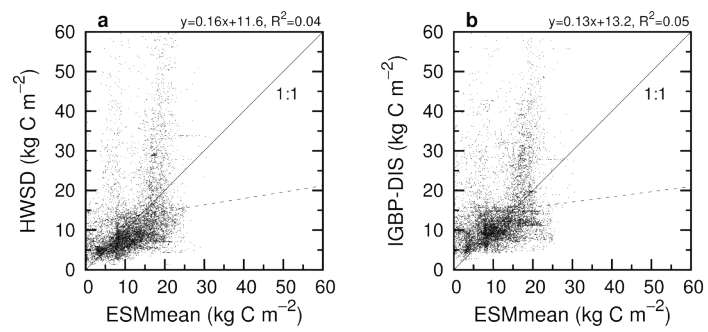

Figure S2: Relationship between ESM ensemble and observational databases at the grid scale (global, 1°).

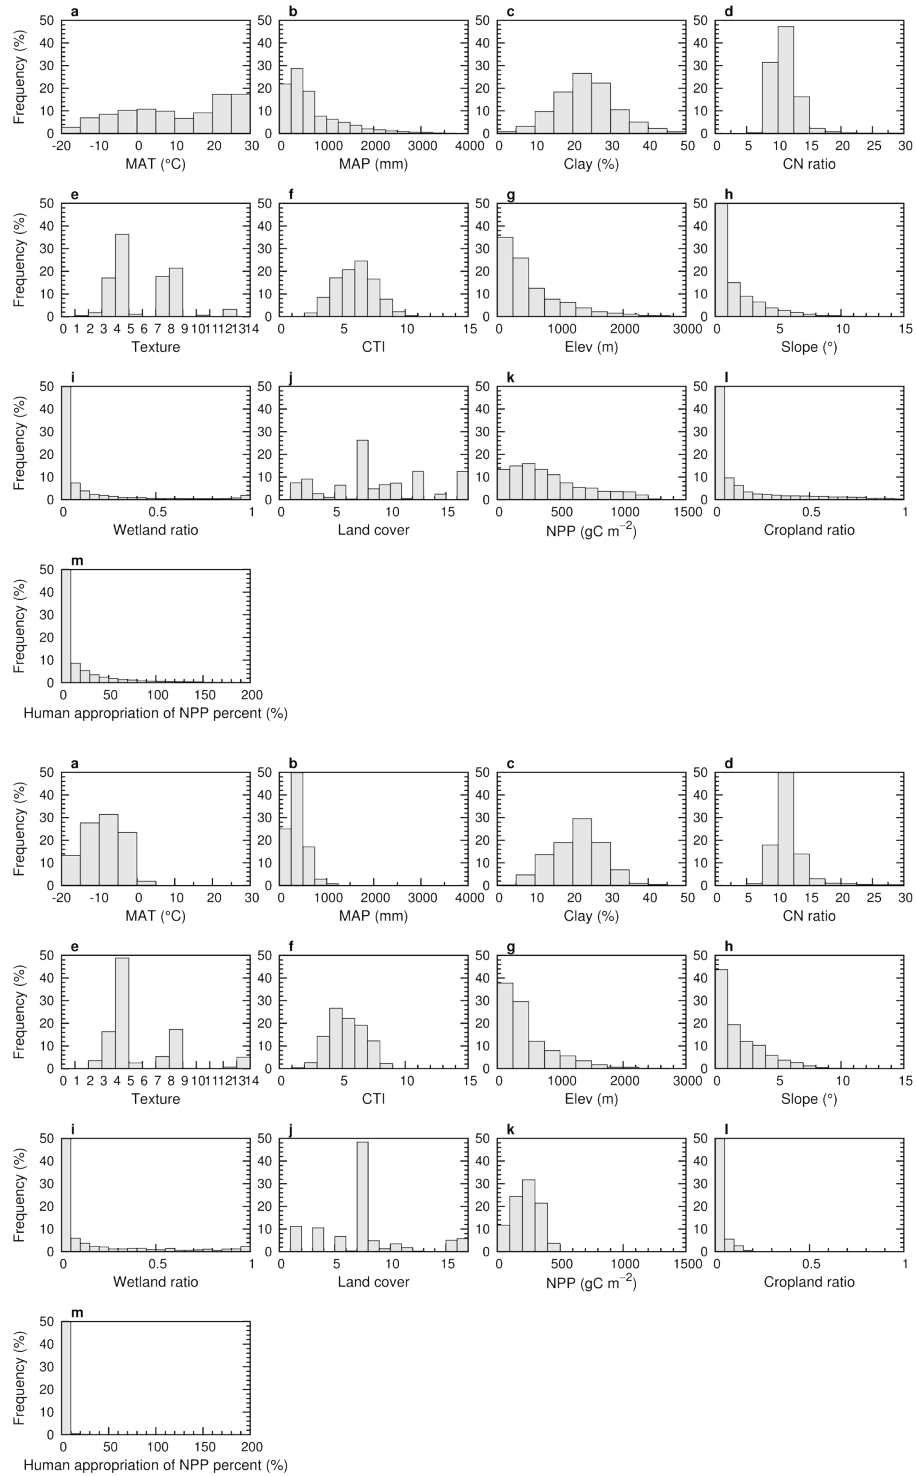

Figure S3: Histogram of variables for global (top) and northern (bottom) databases.

Table S1: Model name and modelling centre of ESMs.

| ESM output name  | Model name                                                   | Modelling centre (or group)                                                                                                                                               |
|------------------|--------------------------------------------------------------|---------------------------------------------------------------------------------------------------------------------------------------------------------------------------|
| BCC-ensemble     | BCC-CSM1.1<br>BCC-CSM1.1(m)                                  | Beijing Climate Center, China Meteorological Administration                                                                                                               |
| BNU-ESM          | BNU-ESM                                                      | College of Global Change and Earth System Science, Beijing Normal University                                                                                              |
| CanESM2          | CanESM2                                                      | Canadian Centre for Climate Modelling and Analysis                                                                                                                        |
| CCSM4            | CCSM4                                                        | National Center for Atmospheric Research                                                                                                                                  |
| CESM1-ensemble   | CESM1(BGC)<br>CESM1(CAM5)<br>CESM1(FASTCHEM)<br>CESM1(WACCM) | Community Earth System Model Contributors                                                                                                                                 |
| CMCC-CESM        | CMCC-CESM                                                    | Centro Euro-Mediterraneo per I Cambiamenti Climatici                                                                                                                      |
| GFDL-ESM2M       | GFDL-ESM2M                                                   | NOAA Geophysical Fluid Dynamics Laboratory                                                                                                                                |
| GISS-ensemble    | GISS-E2-H<br>GISS-E2-H-CC<br>GISS-E2-R<br>GISS-E2-R-CC       | NASA Goddard Institute for Space Studies                                                                                                                                  |
| HadGEM2-CC       | HadGEM2-CC                                                   | Met Office Hadley Centre (additional HadGEM2-ES realizations contributed by Instituto Nacional de Pesquisas Espaciais)                                                    |
| INM-CM4          | INM-CM4                                                      | Institute for Numerical Mathematics                                                                                                                                       |
| IPSL-ensemble    | IPSL-CM5A-LR<br>IPSL-CM5A-MR<br>IPSL-CM5B-LR                 | Institut Pierre-Simon Laplace                                                                                                                                             |
| MIROC-ensemble   | MIROC-ESM<br>MIROC-ESM-CHEM                                  | Japan Agency for Marine-Earth Science and Technology, Atmosphere and Ocean Research Institute (The University of Tokyo), and National Institute for Environmental Studies |
| MPI-ensemble     | MPI-ESM-MR<br>MPI-ESM-LR                                     | Max-Planck-Institut für Meteorologie (Max Planck Institute for Meteorology)                                                                                               |
| MRI-ESM1         | MRI-ESM1                                                     | Meteorological Research Institute                                                                                                                                         |
| NorESM1-ensemble | NorESM1-M<br>NorESM1-ME                                      | Norwegian Climate Centre                                                                                                                                                  |

Table S2: BRT model performance for observational databases.

|        | Database | Slope | Y-intercept | $P$    | $R^2$ | RMSE | $N$   |
|--------|----------|-------|-------------|--------|-------|------|-------|
| Global | HWSD     | 1.03  | −0.38       | <0.001 | 0.96  | 2.35 | 13854 |
|        | IGBP-DIS | 1.02  | −0.27       | <0.001 | 0.98  | 1.47 | 13854 |
| North  | HWSD     | 1.02  | −0.39       | <0.001 | 0.98  | 2.08 | 3176  |
|        | IGBP-DIS | 1.01  | −0.24       | <0.001 | 0.99  | 0.96 | 3176  |
|        | NCSCD    | 1.18  | −4.46       | <0.001 | 0.65  | 9.38 | 3176  |

Table S3: Performance of BRTs for ESM output.

|        | ESM              | Slope | Y-intercept | $P$    | $R^2$ | RMSE  | $N$   |
|--------|------------------|-------|-------------|--------|-------|-------|-------|
| Global | BCC-ensemble     | 1.02  | -0.16       | <0.001 | 0.97  | 0.82  | 13805 |
|        | BNU-ESM          | 1.03  | -0.14       | <0.001 | 0.97  | 0.72  | 13175 |
|        | CanESM2          | 1.03  | -0.37       | <0.001 | 0.96  | 2.00  | 13813 |
|        | CCSM4            | 1.03  | -0.12       | <0.001 | 0.96  | 0.64  | 13112 |
|        | CESM1-ensemble   | 1.03  | -0.10       | <0.001 | 0.96  | 0.58  | 13147 |
|        | CMCC-CESM        | 1.01  | -0.27       | <0.001 | 0.99  | 3.13  | 10382 |
|        | GFDL-ESM2M       | 1.01  | -0.11       | <0.001 | 0.99  | 1.66  | 13854 |
|        | GISS-ensemble    | 1.02  | -0.42       | <0.001 | 0.97  | 3.74  | 13164 |
|        | HadGEM2-CC       | 1.03  | -0.26       | <0.001 | 0.96  | 1.25  | 13357 |
|        | INM-CM4          | 1.04  | -0.47       | <0.001 | 0.96  | 1.81  | 12161 |
|        | IPSL-ensemble    | 1.01  | -0.11       | <0.001 | 0.98  | 0.90  | 13728 |
|        | MIROC-ensemble   | 1.01  | -0.28       | <0.001 | 0.98  | 1.88  | 10698 |
|        | MPI-ensemble     | 1.03  | -0.64       | <0.001 | 0.97  | 2.39  | 11861 |
|        | MRI-ESM1         | 1.03  | -0.38       | <0.001 | 0.96  | 1.77  | 12780 |
|        | NorESM1-ensemble | 1.03  | -0.12       | <0.001 | 0.96  | 0.64  | 13530 |
| North  | BCC-ensemble     | 1.02  | -0.18       | <0.001 | 0.99  | 0.50  | 3170  |
|        | BNU-ESM          | 1.02  | -0.10       | <0.001 | 0.99  | 0.37  | 3134  |
|        | CanESM2          | 1.02  | -0.33       | <0.001 | 0.99  | 1.37  | 3174  |
|        | CCSM4            | 1.02  | -0.06       | <0.001 | 0.98  | 0.35  | 3145  |
|        | CESM1-ensemble   | 1.02  | -0.04       | <0.001 | 0.99  | 0.33  | 3130  |
|        | CMCC-CESM        | 1.09  | -4.75       | <0.001 | 0.84  | 14.52 | 2600  |
|        | GFDL-ESM2M       | 1.02  | -0.69       | <0.001 | 0.99  | 1.30  | 3176  |
|        | GISS-ensemble    | 1.02  | -0.61       | <0.001 | 0.99  | 2.04  | 3108  |
|        | HadGEM2-CC       | 1.01  | -0.09       | <0.001 | 0.99  | 0.45  | 3091  |
|        | INM-CM4          | 1.01  | -0.15       | <0.001 | 0.99  | 0.63  | 2848  |
|        | IPSL-ensemble    | 1.02  | -0.29       | <0.001 | 0.99  | 0.41  | 3167  |
|        | MIROC-ensemble   | 1.01  | -0.51       | <0.001 | 0.99  | 0.92  | 2620  |
|        | MPI-ensemble     | 1.01  | -0.16       | <0.001 | 0.99  | 0.79  | 2834  |
|        | MRI-ESM1         | 1.02  | -0.18       | <0.001 | 0.99  | 0.64  | 3176  |
|        | NorESM1-ensemble | 1.01  | -0.04       | <0.001 | 0.99  | 0.26  | 3176  |
