# Supplementary material for: Data-mining analysis of the global distribution of soil carbon in observational databases and Earth system models
Source: Copernicus journal article supplement (doi:10.5194/gmd-10-1321-2017), 2017-03-28
Supplement: Supplementary file [file gmd-10-1321-2017-supplement-title-page.pdf › gmd-10-1321-2017-supplement-title-page.pdf]

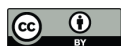

## *Supplement of*

# **Data-mining analysis of the global distribution of soil carbon in observational databases and Earth system models**

**Shoji Hashimoto et al.**

*Correspondence to:* Shoji Hashimoto ([shojih@ffpri.affrc.go.jp](mailto:shojih@ffpri.affrc.go.jp))

- [gmd-10-1321-2017-supplement-title-page.pdf](#)
- Supplement
  - [CodeData.zip](#)
  - [supplement.pdf](#)

The copyright of individual parts of the supplement might differ from the CC-BY 3.0 licence.
